# Supplementary material for: Metformin Attenuates Neutrophil Recruitment through the H3K18 Lactylation/Reactive Oxygen Species Pathway in Zebrafish
Source: MDPI journal article supplement (doi:10.3390/antiox13020176), 2024-01-30
Supplement: s1 [file s1]

**Table S1.** Primers designed for expression analysis in this study.

| <b>Gene</b>    | <b>Gene ID</b> | <b>Note</b> | <b>Forward Primer (5'-3')</b> | <b>Reverse Primer (5'-3')</b> |
|----------------|----------------|-------------|-------------------------------|-------------------------------|
| <i>β-actin</i> | NM_131031.2    | qRT-PCR     | ACGAACGACCAACCTAAACTCT        | TTAGACAACCTACCTCCCTTTGC       |
| <i>il-1β</i>   | NM_212844.2    | qRT-PCR     | GTACTCAAGGAGATCAGCGG          | CTCGGTGTCTTTCTGTCCA           |
| <i>il-6</i>    | NM_001261449.1 | qRT-PCR     | GCTATTCCTGTCTGCTACACTGG       | TGAGGAGAGGAGTGCTGATCC         |
| <i>cxcl8a</i>  | XM_009306855.3 | qRT-PCR     | CCACACACACTCCACACACA          | CCACTGAATTGTCCTTTCATCA        |
| <i>tnf-α</i>   | NM_212859.2    | qRT-PCR     | GCGCTTTTCTGAATCCTACG          | TGCCCAGTCTGTCTCCTTCT          |
| <i>hdac3</i>   | NC_007125.7    | qRT-PCR     | CTATGGTGCTGGGCATCCAA          | CCTCAGAGTGGAACCTGCAC          |
| <i>pkma</i>    | NC_007136.7    | qRT-PCR     | TGCAATGGCGGAAACCTTCT          | AACGTGAAGCAGGTCCGAGT          |
| <i>gapdh</i>   | NC_007127.7    | qRT-PCR     | TCCTGAGCTCAATGGCAAGC          | GGCAGGTTTCTCAAGACGGA          |
| <i>duox</i>    | XM_021470722.1 | qRT-PCR     | TCTTTCATCAGGAAAAACAGCAG       | TCTCTCTGAGGCCTGACGTA          |
| <i>sod1</i>    | NM_131294.1    | qRT-PCR     | TCCACGTCCATGCTTTTGGT          | CAGGTCTCCGACGTGTCTCA          |
| <i>cat</i>     | NM_130912.2    | qRT-PCR     | CCAGAAACGCATGGTGCAA           | GACGCTCCACCACGTGAATA          |
| <i>β-actin</i> | NM_007393.5    | qRT-PCR     | CACTGTGAGTCGCGTCC             | TCATCCATGGCGAACTGGTG          |
| <i>Il-1β</i>   | NM_008361.4    | qRT-PCR     | CACTGTGAGTCGCGTCC             | TCATCCATGGCGAACTGGTG          |
| <i>Il-6</i>    | NM_001314054.1 | qRT-PCR     | TGCCACCTTTTGACAGTGATG         | AAGGTCCACGGGAAAGACAC          |
| <i>Cxcr2</i>   | NM_009909.3    | qRT-PCR     | TCGTAGAACTACTGCAGGATTAAG<br>T | ACAAGGCTCAGCAGAGTCAC          |
| <i>Tnf-α</i>   | NM_001278601.1 | qRT-PCR     | ACCCTCACACTCACAAACCA          | ATAGCAAATCGGCTGACGGT          |
| <i>Hdac3</i>   | NM_010411.2    | qRT-PCR     | GCATTCGAGGACATGGGGAA          | TTTCGGACAGTGTAGCCACC          |
| <i>Pkm</i>     | NM_001405491.1 | qRT-PCR     | TGTAAACCATCACCGGGTCTG         | TTTGCCCTGAAGAGCTGGTTG         |
| <i>Gapdh</i>   | NM_001411840.1 | qRT-PCR     | GAAGGTCGGTGTGAACGGAT          | ACTGTGCCGTTGAATTTGCC          |
| <i>Duox</i>    | NM_001099297.1 | qRT-PCR     | TGGCTTCTTTGGGAGCTCAG          | GGTAGGGTTCTTTCAGGGGC          |
| <i>Sod1</i>    | NM_011434.2    | qRT-PCR     | AAGCGGTGAACCAGTTGTGT          | GCACTGGTACAGCCTTGTGTA         |
| <i>Cat</i>     | NM_009804.2    | qRT-PCR     | AAGATTGCCTTCTCCGGGTG          | GACATCAGGTCTCTGCGAGG          |
